# Supplementary material for: Tridimensional Retinoblastoma Cultures as Vitreous Seeds Models for Live-Cell Imaging of Chemotherapy Penetration
Source: MDPI journal article supplement (doi:10.3390/ijms20051077), 2019-03-02
Supplement: s1 [file s1]

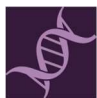

Article

# Tridimensional Retinoblastoma Cultures as Vitreous Seeds Models for Live-Cell Imaging of Chemotherapy Penetration

Ursula Winter <sup>1</sup>, Rosario Aschero <sup>2</sup>, Federico Fuentes <sup>3</sup>, Fabian Buontempo <sup>4</sup>, Santiago Zugbi <sup>4</sup>, Mariana Sgroi <sup>5</sup>, Claudia Sampor <sup>6</sup>, David H. Abramson <sup>7</sup>, Angel M. Carcaboso <sup>8</sup> and Paula Schaiquevich <sup>1,4,\*</sup>

<sup>1</sup> National Scientific and Technical Research Council (CONICET), Buenos Aires, Argentina, CP1425; winter.u.a@gmail.com

<sup>2</sup> Pathology Service, Hospital de Pediatría Prof. Dr. JP Garrahan, Buenos Aires, Argentina, CP1425; rosarioaschero@gmail.com

<sup>3</sup> Institute of Experimental Medicine (IMEX), National Academy of Medicine, Buenos Aires, Argentina, CP1425; fedefuentes@gmail.com

<sup>4</sup> Pharmacy, Hospital de Pediatría Prof. Dr. JP Garrahan, Buenos Aires, Argentina, CP1425; fabuontempo@yahoo.com.ar (F.B.); santiagozugbi@gmail.com (S.Z.)

<sup>5</sup> Ophthalmology Service, Hospital de Pediatría Prof. Dr. JP Garrahan, Buenos Aires, Argentina, CP1425; marianasgroi@gmail.com

<sup>6</sup> Hematolog-Oncology Service, Hospital de Pediatría Prof. Dr. JP Garrahan, Buenos Aires, Argentina, CP1425; claudiasampor@hotmail.com

<sup>7</sup> Ophthalmic Oncology Service, Memorial Sloan-Kettering Cancer Center, New York, NY 10065, USA; Abramsod@mskcc.org

<sup>8</sup> Institut de Recerca Sant Joan de Deu, Barcelona, Spain and Department of Pediatric Hematology and Oncology, Hospital Sant Joan de Deu, Barcelona, Spain, 08950; amontero@fsjd.org

\* Correspondence: paulas@conicet.gov.ar; Tel.: +54-11-4122-6000 (ext. 7138)

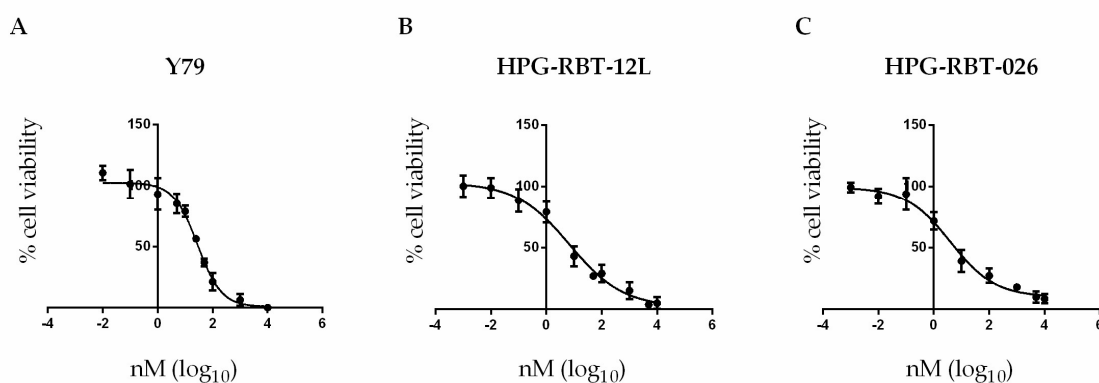

**Figure S1.** Effect of topotecan on retinoblastoma cell proliferation. Growth inhibition assay performed on Y79 (A), HPG-RBT-12L (B), and HPG-RBT-26 (C) cells after 72-h incubation with different concentrations of topotecan. All symbols represent % of cell proliferation as compared to untreated control cells, expressed as means (SEM) of three independent experiments, each performed in triplicates.

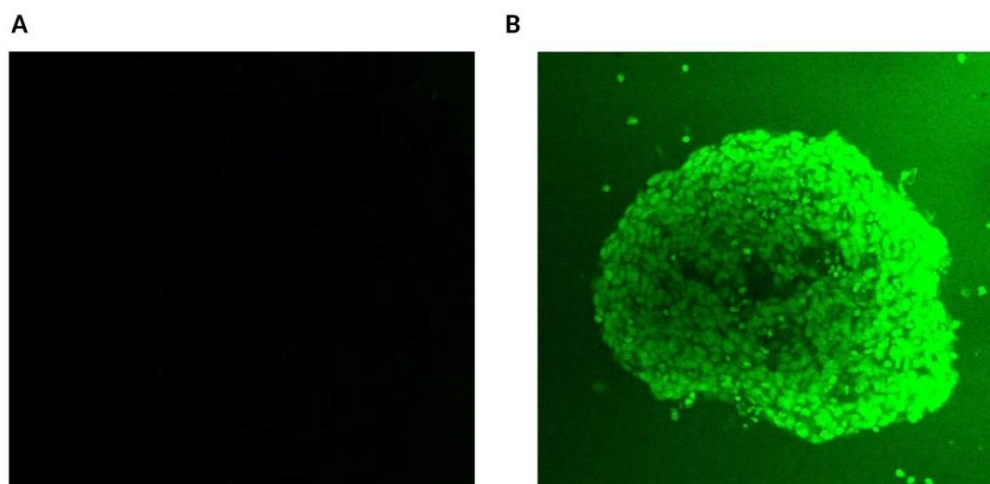

**Figure S2.** Acquisition of signal (A) before topotecan and (B) after topotecan addition into the culture medium containing large tumorspheres. Images taken at 20× magnification.

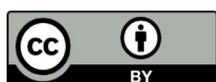

© 2019 by the authors. Submitted for possible open access publication under the terms and conditions of the Creative Commons Attribution (CC BY) license (<http://creativecommons.org/licenses/by/4.0/>).
